# Supplementary material for: Lipid-Coated Zinc Oxide Nanoparticles as Innovative ROS-Generators for Photodynamic Therapy in Cancer Cells
Source: Nanomaterials (Basel). 2018 Mar 2;8(3):143. doi: 10.3390/nano8030143 (PMC5869634; doi:10.3390/nano8030143)
Supplement: Supplementary file 1 [file nanomaterials-08-00143-s001.pdf]

## Supplementary Information

### Lipid-coated zinc oxide nanoparticles as innovative ROS-generators for photodynamic therapy in cancer cells

Andrea Ancona<sup>1</sup>, Nadia Garino<sup>1,3</sup>, Bianca Dumontel<sup>1</sup>, Benjamin Demarco<sup>2</sup>, Dimitra Chatzitheodoridou<sup>2</sup>, Walter Fazzini<sup>1</sup>, Hanna Engelke<sup>2</sup> and Valentina Cauda<sup>1,3,\*</sup>

<sup>1</sup> Department of Applied Science and Technology, Politecnico di Torino, Corso Duca degli Abruzzi 24, 10129 Turin, Italy;

<sup>2</sup> Department of Chemistry, Ludwig-Maximilians-University of Munich, Butenandtstrasse 11E, 81377 Munich, Germany;

<sup>3</sup> Center for Sustainable Future Technologies - CSFT@POLITO, Istituto Italiano di Tecnologia, Corso Trento 21, 10129 Turin, Italy;

\* Correspondence: valentina.cauda@polito.it; Tel.: +39-011-090-7389

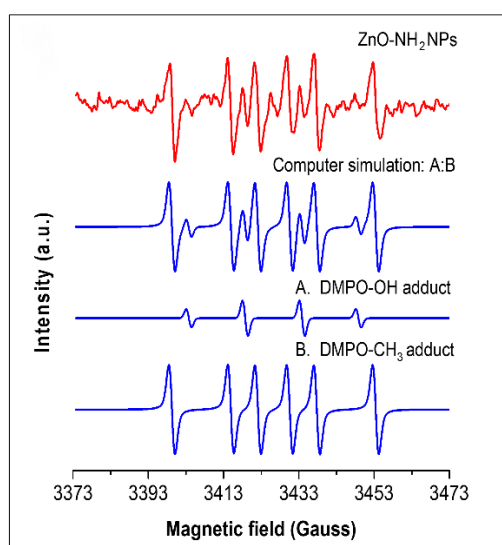

**Figure S1.** ROS formation in aqueous suspensions of amine-functionalized ZnO nanoparticles (500 µg/ml irradiated with UV light). Computer simulation reveals that DMPO-OH and DMPO-CH<sub>3</sub> spin adducts are detected (blue curves).

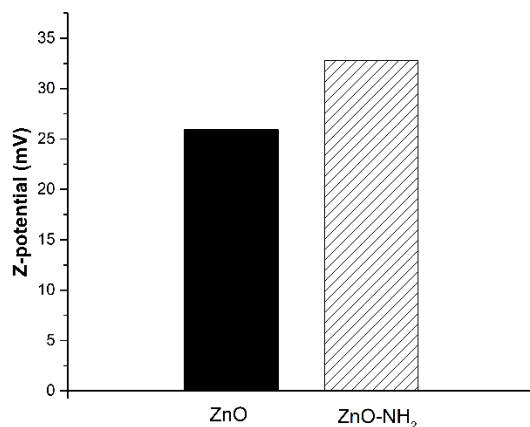

**Figure S2.** Z-potential measurement of pristine ZnO NPs and amine-functionalized NPs.
